# Supplementary material for: Enhancing the efficiency and stability of perovskite solar cells by incorporating CdS and Cd(SCN2H4)2Cl2into the CH3NH3PbI3active layer
Source: Royal Society of Chemistry journal article supplement (doi:10.1039/c8ta09933b), 2018-12-04
Supplement: c8ta09933b1.pdf [file c8ta09933b1.pdf]

## Supplementary information for

Enhanced efficiency and stability of perovskite solar cells by incorporating CdS and Cd(SCN<sub>2</sub>H<sub>4</sub>)<sub>2</sub>Cl<sub>2</sub>  
into CH<sub>3</sub>NH<sub>3</sub>PbI<sub>3</sub> active layer

Liangxin Zhu,<sup>a,b</sup> Chong Chen,<sup>a,b\*</sup> Fumin Li,<sup>a,b</sup> Zhitao Shen,<sup>a,b</sup> Yujuan Weng,<sup>a,b</sup> Qingsong Huang<sup>c\*</sup>,  
Mingtai Wang<sup>d\*</sup>

<sup>a</sup>*Henan Key Laboratory of Photovoltaic Materials, Henan University, Kaifeng 475004, P.R.China,*

<sup>b</sup>*School of Physics and Electronics, Henan University, Kaifeng 475004, P.R.China and*

<sup>c</sup>*School of Chemical Engineering, Sichuan University, Chengdu 610065, P.R.China*

<sup>d</sup>*Institute of Applied Technology, Hefei Institutes of Physical Science, Chinese Academy of Sciences,  
Hefei, 230031, PR China*

E-mail: chongchen@henu.edu.cn (C. Chen), qshuang@scu.edu.cn (Q. Huang), and mtwang@ipp.ac.cn (M. Wang).

### 1. First-principles calculations

Electronic structure calculations are performed with the density functional theory as implemented in the Vienna ab initio simulation package,<sup>1,2</sup> employing projected augmented wave potentials to describe the atomic core electrons and a plane wave basis set with a kinetic energy cutoff of 450 eV to expand the Kohn–Sham electronic states. For the exchange and correlation functional, the generalized gradient approximation (GGA) in the Perdew–Burke–Ernzerhof (PBE) format was used.<sup>3</sup>

The bulk CH<sub>3</sub>NH<sub>3</sub>PbI<sub>3</sub> and CdCl{SC(NH<sub>2</sub>)<sub>2</sub>}<sub>2</sub> were optimized from experimental crystal structures.<sup>4,5</sup> In particular, a tetragonal cell ( $a = b = 8.84$  Å and  $c = 12.69$  Å) of CH<sub>3</sub>NH<sub>3</sub>PbI<sub>3</sub> and an orthorhombic cell ( $a = 13.15$  Å,  $b = 5.83$  Å and  $c = 6.50$  Å) of CdCl{SC(NH<sub>2</sub>)<sub>2</sub>}<sub>2</sub> have been used. In the structural optimization, the k-point meshes to sample the Brillouin zone were  $5 \times 5 \times 3$  and  $3 \times 5 \times 5$  generated by Monkhorst–Pack scheme<sup>6</sup> for CH<sub>3</sub>NH<sub>3</sub>PbI<sub>3</sub> and CdCl{SC(NH<sub>2</sub>)<sub>2</sub>}<sub>2</sub>, respectively. All atoms were allowed to relax until the atomic forces were smaller than 0.02 eV Å<sup>-1</sup>, while the lattice constants were fixed to reduce computational cost. After structural optimization, the densities of states

---

E-mail: chongchen@henu.edu.cn (C. Chen), qshuang@scu.edu.cn (Q. Huang).  
(Dr. Chong Chen and Dr. Qingsong Huang)

were calculated using more dense k-point grids with  $9 \times 9 \times 7$  and  $7 \times 9 \times 9$  for  $\text{CH}_3\text{NH}_3\text{PbI}_3$  and  $\text{CdCl}\{\text{SC}(\text{NH}_2)_2\}_2$ , respectively.

The  $\text{CH}_3\text{NH}_3\text{PbI}_3/\text{CdS}$  interface was described by 8 atomic layers  $\text{CH}_3\text{NH}_3\text{PbI}_3$  (001) contacted with 16 layers CdS (001), and a vacuum thickness of 15 Å was added along the  $z$  direction. A  $6 \times 6 \times 1$  gamma centered k-point mesh was used to sample the Brillouin zone. The DFT-D3 method with Becke-Jonson damping was adopted to include van der Waals interactions.<sup>7</sup> During structural optimization, all the atoms and the lattice constants were fully relaxed until the atomic forces are smaller than 0.05 eV Å<sup>-1</sup>.

The binding energy of the interface system was calculated to assess the structural stability. Here, the binding energy  $E_b$  per area is defined as

$$E_b = [E(\text{CdS}) + E(\text{CH}_3\text{NH}_3\text{PbI}_3) - E(\text{CH}_3\text{NH}_3\text{PbI}_3/\text{CdS})]/A,$$

where  $E(\text{CdS})$ ,  $E(\text{CH}_3\text{NH}_3\text{PbI}_3)$  and  $E(\text{CH}_3\text{NH}_3\text{PbI}_3/\text{CdS})$  are the total energies of the CdS film, the  $\text{CH}_3\text{NH}_3\text{PbI}_3$  surface and the combined systems, respectively.  $A$  is the surface area of the supercell.

## References:

1. G. Kresse, J. Hafner, *Phys. Rev. B* 1993, **47**, R558
2. G. Kresse, J. Furthmüller, *Phys. Rev. B* 1996, **54**, 11169
3. J. P. Perdew, K. Burke, M. Ernzerhof, *Phys. Rev. Lett.*, 1996, **77**, 3865.
4. Y. Yamada, T. Yamada, L. Q. Phuong, N. Maruyama, H. Nishimura, A. Wakamiya, Y. Murata, Y. Kanemitsu, *J. Am. Chem. Soc.*, 2015, **137**, 10456.
5. C. Marcos, J. M. Alía, V. Adovasio, M. Prieto, S. García-Granda, *Acta Cryst.*, 1998, **C54**, 1225.
6. H. J. Monkhorst, J. D. Pack, *Phys. Rev. B: Solid State*, 1976, **13**, 5188.
7. S. Grimme, S. Ehrlich, L. Goerigk, *J. Comp. Chem.*, 2011, **32**, 1456.

## 2. Supplementary Figures

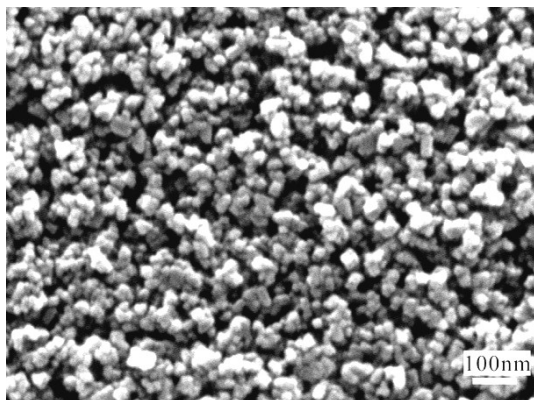

Figure S1

Fig. S1. Top-view SEM image of as-prepared FTO/cp-TiO<sub>2</sub>/mp-TiO<sub>2</sub> film.

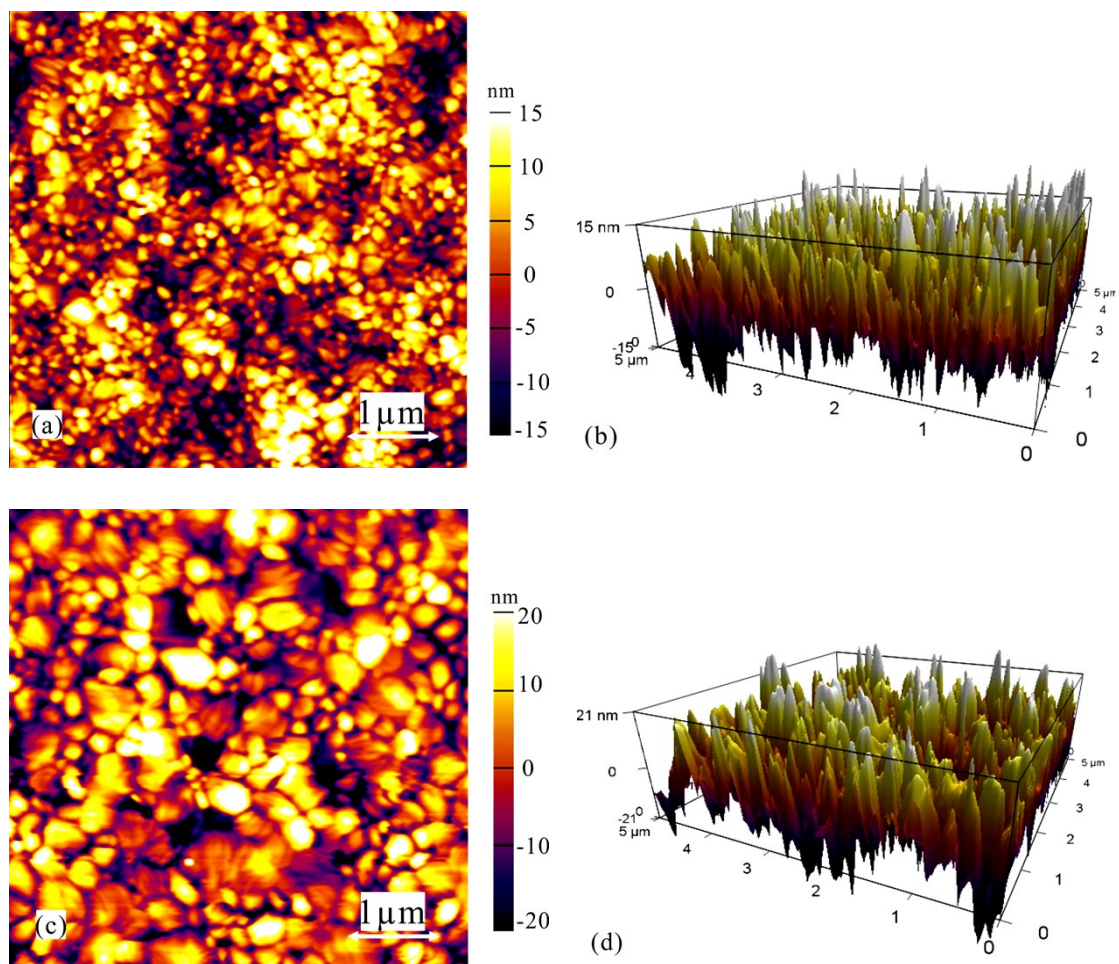

Figure S2

Fig. S2 SEM images of the capping layers on top of the (a) FTO/cp-TiO<sub>2</sub>/mp-TiO<sub>2</sub>/CH<sub>3</sub>NH<sub>3</sub>PbI<sub>3</sub> (a) and (b) FTO/cp-TiO<sub>2</sub>/mp-TiO<sub>2</sub>/C:C:CH<sub>3</sub>NH<sub>3</sub>PbI<sub>3</sub> films at 300, 000× magnification.

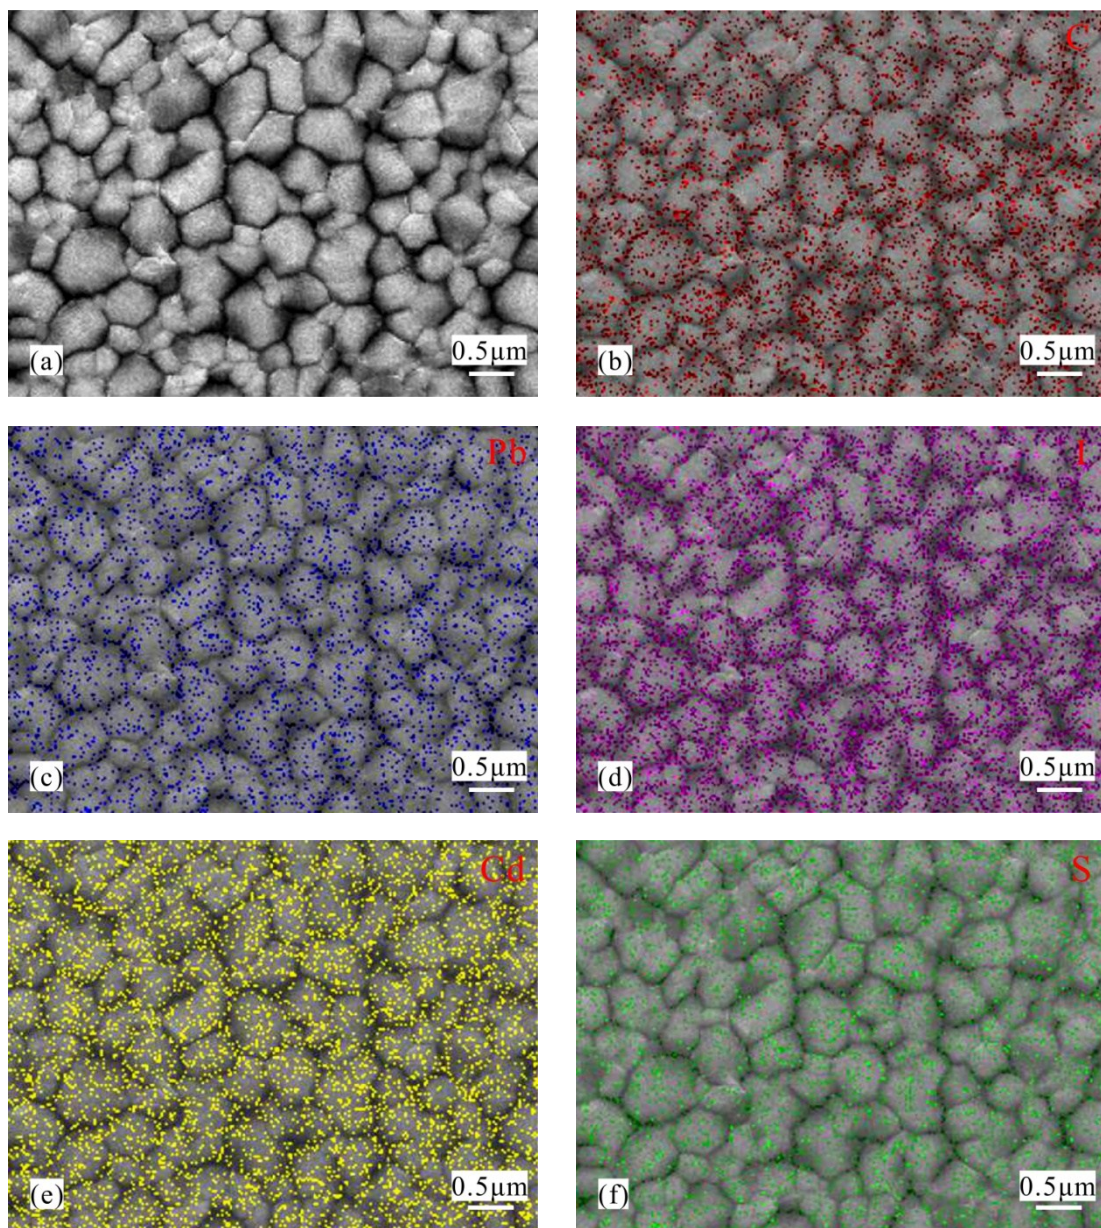

Figure S3

Fig. S3 Top-view (cross-sectional) SEM image and EDX spectrum of FTO/cp-TiO<sub>2</sub>/mp-TiO<sub>2</sub>/C:C:CH<sub>3</sub>NH<sub>3</sub>PbI<sub>3</sub> film (a), C element distribution (b), Pb element distribution (c), I element distribution (d), Cd element distribution (e), and S element distribution (f).



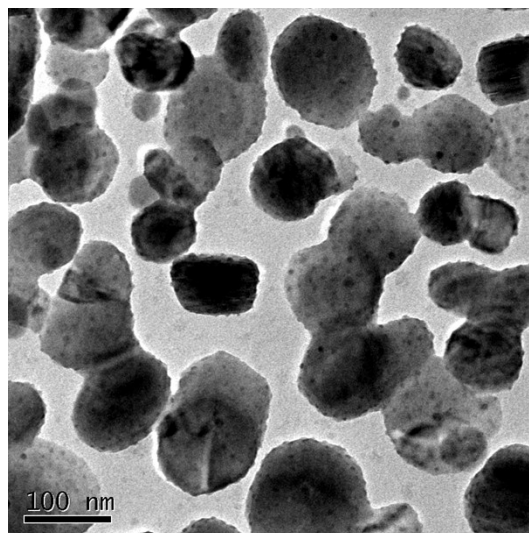

Figure S4

Fig. S4 (a) The low-magnification TEM image of C:C:CH<sub>3</sub>NH<sub>3</sub>PbI<sub>3</sub> nanoparticles after ultrasonic dispersion treatment. The small size CdS nanoparticles are clearly observed on the surface of large size CH<sub>3</sub>NH<sub>3</sub>PbI<sub>3</sub> crystals.

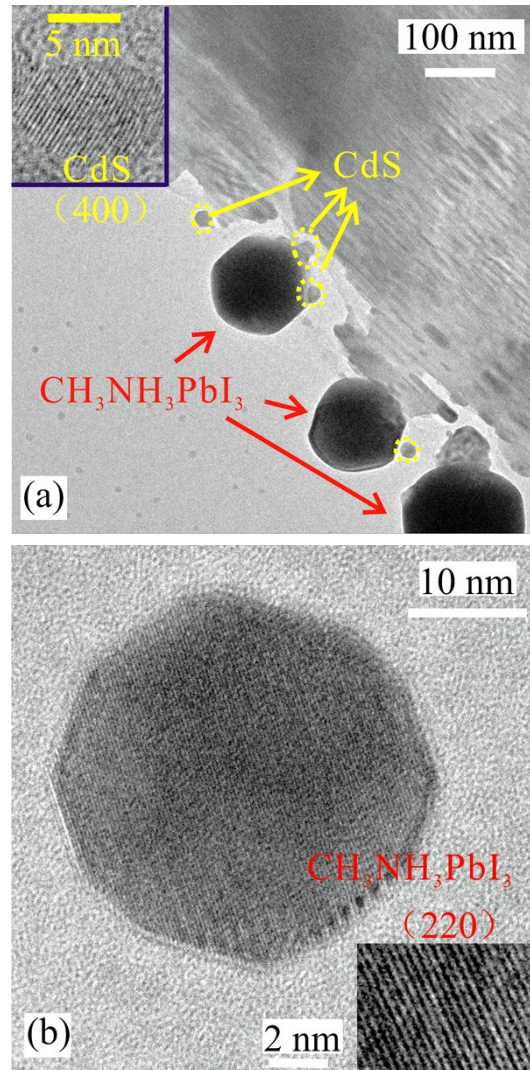

Figure S5

Fig. S5 (a) The TEM image of C:C:CH<sub>3</sub>NH<sub>3</sub>PbI<sub>3</sub> composite film and the inset is the HR-TEM image of one CdS nanoparticle. (b) The HR-TEM image of one single CH<sub>3</sub>NH<sub>3</sub>PbI<sub>3</sub> particle.

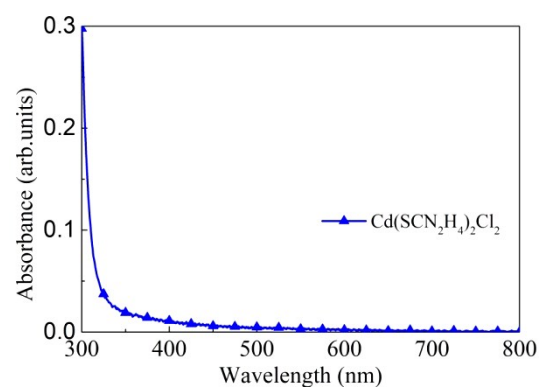

Figure S6 UV-vis absorption spectra of the  $\text{Cd}(\text{SCN}_2\text{H}_4)_2\text{Cl}_2$  film.



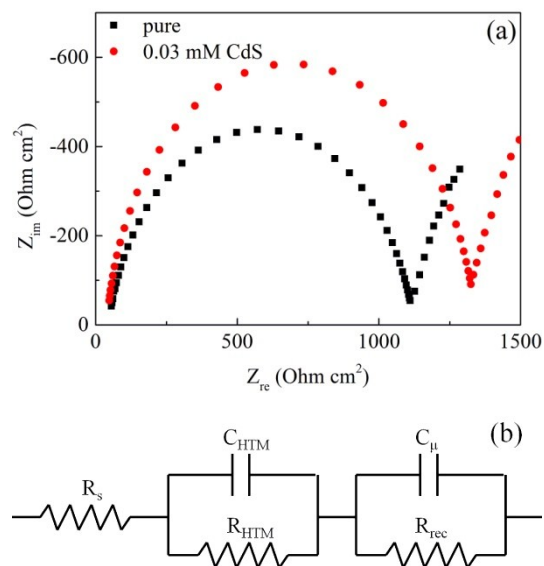

Fig. S7 Electrochemical impedance spectra (EIS) of the PSCs under illumination  $100 \text{ mW/cm}^2$ .

**Table S1** The fitting parameters for measured EIS results with different device.

| Devices                                                    | $R_s (\Omega \text{ cm}^2)$ | $R_{HTM} (\text{mA cm}^{-2})$ | $R_{rec} (\text{mA cm}^{-2})$ | $C_{HTM} (\mu\text{F cm}^{-2})$ | $C_{\mu} (\text{nF m}^{-2})$ |
|------------------------------------------------------------|-----------------------------|-------------------------------|-------------------------------|---------------------------------|------------------------------|
| Solar cells with pure $\text{CH}_3\text{NH}_3\text{PbI}_3$ | 44.88                       | 1202                          | 1077                          | 24.9                            | 45.8                         |
| Solar cells with C:C: $\text{CH}_3\text{NH}_3\text{PbI}_3$ | 39.76                       | 1345                          | 1294                          | 81.8                            | 13.5                         |
